# Supplementary material for: Entropy-controlled biradical–quinoid isomerization of a π-conjugated delocalized biradical
Source: Royal Society of Chemistry journal article supplement (doi:10.1039/c4cp04606d), 2014-11-19
Supplement: c4cp04606d1.pdf [file c4cp04606d1.pdf]

**Electronic Supplementary Information (ESI) for:**

# **Entropy-Controlled Biradical–Quinoid Isomerization of A $\pi$ -Conjugated Delocalized Biradical**

**Katsuya Mutoh,<sup>a</sup> Yuki Nakagawa,<sup>b</sup> Sayaka Hatano,<sup>c</sup> Yoichi Kobayashi,<sup>a</sup> Jiro Abe<sup>\*,a,d</sup>**

<sup>a</sup>*Department of Chemistry, School of Science and Engineering, Aoyama Gakuin University, 5-10-1 Fuchinobe, Chuo-ku, Sagami-hara, Kanagawa 252-5258, Japan*

<sup>b</sup>*Itoh Optical Industrial Co.,Ltd., 3-19 Miyanari-cho, Gamagori, Aichi 443-0041, Japan*

<sup>c</sup>*Department of Chemistry, Graduate School of Science, Hiroshima University, 1-3-1 Kagamiyama, Higashi-Hiroshima, Hiroshima 739-8526, Japan*

<sup>d</sup>*CREST, Japan Science and Technology Agency (JST), K's Gobancho, 7 Gobancho, Chiyoda-ku, Tokyo 102-0076, Japan*

E-mail: [jiro\\_abe@chem.aoyama.ac.jp](mailto:jiro_abe@chem.aoyama.ac.jp)

## **CONTENTS**

|                                                                                      |           |
|--------------------------------------------------------------------------------------|-----------|
| <b>1. UV-vis absorption spectrum of tF-BDPI-2YD</b>                                  | <b>S2</b> |
| <b>2. Transient absorption spectra for microsecond region of tF-BDPI-2YD</b>         | <b>S2</b> |
| <b>3. First-order plots for the transient absorption dynamics of tF-BDPI-2YD</b>     | <b>S2</b> |
| <b>4. The effect of O<sub>2</sub> on the biradical–quinoid thermal isomerization</b> | <b>S3</b> |
| <b>5. The rate constants for biradical–quinoid thermal isomerization</b>             | <b>S4</b> |

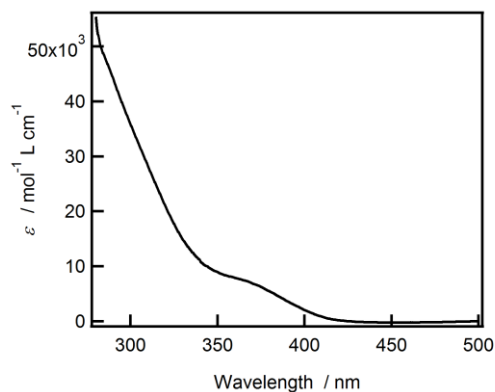

**Fig. S1** UV-vis absorption spectrum of tF-BDPI-2YD in benzene.

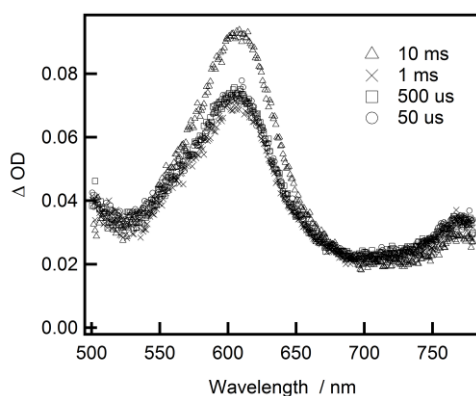

**Fig. S2** Transient absorption spectra of tF-BDPI-2YD in benzene at 298 K ( $7 \times 10^{-5}$  M; 2 mm light path length). Each spectrum was recorded at 50  $\mu$ s, 500  $\mu$ s, 1 ms and 10 ms after excitation with a nanosecond laser pulse (excitation wavelength, 355 nm; pulse width, 5 ns; power, 0.2 mJ/pulse).

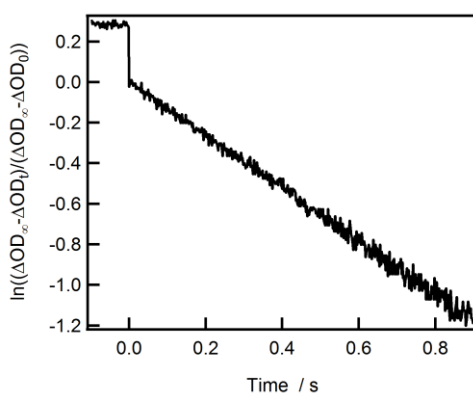

**Fig. S3** First-order plots for the transient absorption dynamics of tF-BDPI-2YD at 605 nm in benzene at 298 K.

### The effect of O<sub>2</sub> on the biradical–quinoid thermal isomerization

The thermal biradical–quinoid isomerization can be described through the possible two pathways as follows: (i) the intersystem crossing from the photo-generated triplet biradical state to the singlet biradical state has a large activation energy like delayed fluorescence, resulting in the long lifetime of the triplet species and the fast isomerization between singlet biradical and quinoid states. (ii) The singlet biradical species cannot overcome the large activation barrier for the biradical–quinoid isomerization due to the large bond alternation around the central phenylene group. In the case of (i), the singlet and triplet states would be produced in a 1:3 ratio after the C–N bond cleavage because those two states are almost degenerated, suggested by the ESR signal which does not show a clear fine structure (reference 33 in the main text). When singlet and triplet states are degenerated, it is difficult to consider that the intersystem crossing needs high thermal energy. In addition, the absorption band of the quinoid species at 609 nm should be observed even though the weak UV light is irradiated to the tF-BDPI-2YD solution, which is conflicted to the experimental results. Moreover, the thermal isomerization rate does not depend on the concentration of O<sub>2</sub> (Fig. S4) which is the general triplet state quencher. Therefore, we concluded the slow thermal isomerization is due to the activation free energy between the singlet biradical and quinoid species (ii).

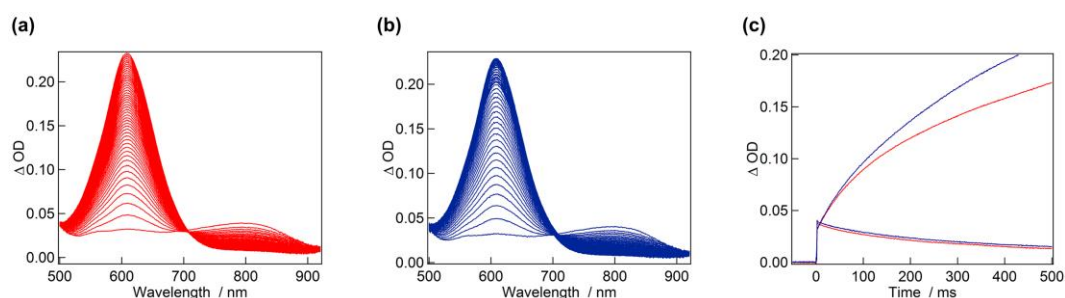

**Fig. S4** Transient absorption spectra of tF-BDPI-2YD in benzene under (a) air and (b) O<sub>2</sub> at 298 K ( $4.5 \times 10^{-5}$  M; 10 mm light path length). Each of the spectra was recorded at 20 ms intervals from 2 ms after excitation with a nanosecond laser pulse (excitation wavelength, 355 nm; pulse width, 5 ns; power, 4 mJ/pulse). (c) Time profiles of the  $\Delta OD$  values at 605 and 800 nm, (red) air and (blue) with O<sub>2</sub> bubbling.

## The rate constants for the biradical–quinoid thermal isomerization

**Table S1** First-order rate constants for the time profiles of the  $\Delta OD$  at 605 nm of the thermal isomerization reaction from biradical to quinoid species, estimated as the results of the average for at least 9 times measurements.

| T / K | k / s <sup>-1</sup> | standard deviation |
|-------|---------------------|--------------------|
| 278   | 1.503               | 0.039              |
| 283   | 1.472               | 0.098              |
| 288   | 1.443               | 0.080              |
| 293   | 1.414               | 0.092              |
| 298   | 1.391               | 0.073              |
| 303   | 1.358               | 0.072              |
| 308   | 1.333               | 0.101              |
| 313   | 1.329               | 0.073              |
